# Supplementary material
Source: Springer Nature journal article supplement (https://www.springermedizin.de/resource/supplementary/12245_2011_42_MOESM1_ESM.pdf/9672638)

**Percent**

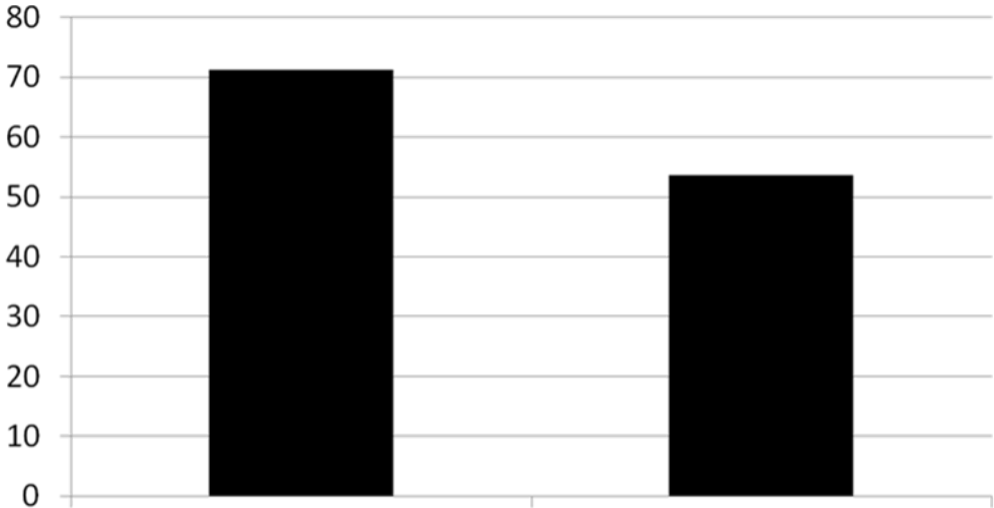

Caucasian

Non-Caucasian

**Race**

Supplement: MOESM1 [file 9672638]
